# Supplementary material for: Continuous flow synthesis of core cross-linked star polymers via photo-induced copper mediated polymerization
Source: Royal Society of Chemistry journal article supplement (doi:10.1039/c9py00134d), 2019-01-01
Supplement: c9py00134d1.pdf [file c9py00134d1.pdf]

## Supporting Information

# Continuous Flow Synthesis of Core Cross-Linked Star Polymers *via* Photo-Induced Copper Mediated Polymerization

*Jeroen H. Vrijsen<sup>a</sup>, Camila O. Medeiros<sup>a,b</sup>, Jonas Gruber<sup>c</sup> and Tanja Junkers<sup>a,d\*</sup>*

<sup>a</sup>Institute for Materials Research (IMO) Hasselt University, Martelarenlaan 42, 3500 Hasselt, Belgium.

<sup>b</sup> Departamento de Engenharia Química, Escola Politécnica da Universidade de São Paulo, Av. Prof. Luciano Gualberto, Trav. 3, no. 380, CEP 05508-010 São Paulo, SP, Brazil

<sup>c</sup> Departamento de Química Fundamental, Instituto de Química da Universidade de São Paulo, Av. Prof. Lineu Prestes, 748, CEP 05508-000 São Paulo, SP, Brazil

<sup>d</sup>Polymer Reaction Design Group, School of Chemistry Monash University 19 Rainforest Walk, Building 23, Clayton, Vic 3800 (Australia)  
<sup>b</sup>Polymer Reaction Design Group, School of chemistry, Monash University, 19 Rainforest Walk, Building 23, Clayton, VIC 3800, Australia

## Content

|                                                                                            |      |
|--------------------------------------------------------------------------------------------|------|
| Materials.....                                                                             | S 2  |
| Core cross-linked star polymer synthesis in batch.....                                     | S 2  |
| Characterization .....                                                                     | S 3  |
| Reactor design .....                                                                       | S 6  |
| SEC evolution of CCS polymer formation <i>via</i> flow and batch polymerization.....       | S 7  |
| Surface functionalized core cross-linked star polymer synthesis in a reactor cascade ..... | S 8  |
| Pseudomiktoarm core cross-linked star polymer synthesis in a flow reactor cascade.....     | S 9  |
| References.....                                                                            | S 10 |

## Materials

The monomers methyl acrylate (MA, Acros Organics, 99%) and benzyl acrylate (BnA, TCI Chemicals, >97%) and the crosslinker 1,4-butanediol diacrylate (BDDA, Sigma-Aldrich, 90%) were deinhibited over a column of activated basic alumina before polymerization. The initiator ethyl  $\alpha$ -bromoisobutyrate (EBiB, 98%) and catalyst copper(II)dibromide ( $\text{Cu}^{\text{II}}\text{Br}_2$ , 99%) and radical inhibitor hydroquinone (HQ, 99%) were purchased from Acros Organics and used without further purification. The initiator 2-hydroxyethyl 2-bromoisobutyrate (HEBiB)<sup>1</sup> and the ligand tris-(2(dimethylamino)ethyl)amine ( $\text{Me}_6\text{TREN}$ )<sup>2</sup> were synthesized following literature procedures, the used chemicals for the synthesis were purchased from Fisher Scientific and Alfa Aesar. Dimethylsulfoxide (DMSO, pa grade), tetrahydrofuran (THF, HPLC grade), Chloroform (>99%) and N,N-dimethylformamide (DMF, 99%) were purchased from Fisher Scientific and used as received.

## Core cross-linked star polymer synthesis in batch

A 10 mL solution of pMA ( $M_n = 2600 \text{ g}\cdot\text{mol}^{-1}$ ,  $D = 1.13$ ),  $\text{Cu}^{\text{II}}\text{Br}_2$  and  $\text{Me}_6\text{TREN}$  in DMSO was prepared. A second 10 mL solution of BDDA and DMF in DMSO was made in a separate amber volumetric flask. (pMA :  $\text{Cu}^{\text{II}}\text{Br}_2$  :  $\text{Me}_6\text{TREN}$  : BDDA : DMF = 1 : 0.02 : 0.09 : 10 : 1; [pMA] = 0.0325 M). DMF was used as internal standard for determination of the cross-linker conversion via  $^1\text{H}$  NMR. These were mixed together in an Erlenmeyer flask and purged with  $\text{N}_2$  for 15 minutes before being placed in a Multilamp Reactor MLU 18 (Photochemical Reactor Ltd.) equipped with ten 15 W lamps (Vilber Lourmat) with a peak emission of 365 nm. Samples for SEC(-MALS) and  $^1\text{H}$ -NMR were taken at timed intervals (5, 10, 15, 30 and 60 min). All samples for SEC(-MALS) were immediately quenched by diluting in THF, passing over a short silica column to remove the copper catalyst and addition of HQ.

## Characterization

**<sup>1</sup>H NMR** Monomer and crosslinker conversions were determined via Nuclear Magnetic Resonance spectra, which were recorded in CDCl<sub>3</sub> at room temperature on a Varian Inova spectrometer at 400 MHz for <sup>1</sup>H NMR using a 5 mm OneNMR PFG probe (Agilent Technologies Inc, Santa Clara, CA, USA). Free induction decays were collected with a 90° pulse of 6.9 μs, a spectral width of 6400 Hz, an acquisition time of 3 s, a preparation delay of 12 s and 64 accumulations.

**SEC(-MALS)** Polymer size distributions were measured using a Tosoh EcoSEC HLC-8320GPC consisting out of an autosampler and a PSS guard column SDV (50 × 7.5 mm), followed by three PSS SDV analytical linear XL columns (5 μm, 300 × 7.5 mm) and a differential refractive index detector (Tosoh EcoSEC RI). Column temperature was maintained at a constant 40°C. A flow rate of 1·mL·min<sup>-1</sup> of high-performance liquid chromatography (HPLC) grade tetrahydrofuran (THF) was used as eluent with toluene as flow marker. Calibration was performed using linear narrow polystyrene (PS) standards from PSS Laboratories in the range of 470-7.5 × 10<sup>6</sup> g·mol<sup>-1</sup>. Mark-Houwink-Kuhn-Sakurada parameters for pMA ( $\alpha = 0.74$ ,  $K = 10.2 \times 10^{-5} \text{ dL}\cdot\text{g}^{-1}$ , THF 30°C)<sup>3</sup> were used for sample analysis. When SEC-MALS was performed a similar SEC setup connected to a Wyatt Optilab TrEX RI detector and a Wyatt Heleos Dawn II multiangular light scattering was used. The weight average molecular weight of the synthesized core cross-linked star polymers was determined via Astra V. More information regarding the used  $dn/dc$  values can be found below.

**ESI-MS** Spectral mass analysis was performed using an LCQ Fleet mass spectrometer (ThermoFischer Scientific) equipped with an atmospheric pressure ionization source set in nebulizer assisted electro spray mode. Calibration was performed in the mass/charge ( $m/z$ ) range of 220–2000 with a standard solution containing caffeine, L-methionyl-arginyol-phenylalanylalanine acetate H<sub>2</sub>O and Ultramark 1621. A constant spray voltage of 5 kV was employed with an applied nitrogen dimensionless auxiliary gas flow-rate of 3 and a dimensionless sheath gas flow-rate of 3. The capillary voltage, tube lens offset voltage and capillary temperature were set to 25, 120 V, and 275 °C, respectively. A 250 μL aliquot of

a polymer solution with concentration of  $10 \mu\text{g}\cdot\text{mL}^{-1}$  was injected with HPLC grade THF and methanol (THF:methanol 3:2) as solvent.

**Determination of arm number** The arm number was determined via light scattering and following equations from literature<sup>4, 5</sup>:

$$\frac{A_{star}}{A_{MI}} = \frac{A_{star}}{1 - A_{star}} = \frac{\left(\frac{dn}{dc}\right)_{star}(X_{MI}m_{MI} + m_{CL}conv_{CL})}{\left(\frac{dn}{dc}\right)_{MI}(1 - X_{MI})m_{MI}}$$

$$\left(\frac{dn}{dc}\right)_{star} = \frac{X_{MI}m_{MI}\left(\frac{dn}{dc}\right)_{MI} + m_{CL}conv_{CL}\left(\frac{dn}{dc}\right)_{CL}}{X_{MI}m_{MI} + m_{CL}conv_{CL}}$$

$A_{star}$  and  $A_{MI}$  respectively are the integrated areas of the peaks that correspond to the star product and any residual MI from the differential refractive index SEC chromatograms. These areas are determined via peak analysis in Origin. The  $dn/dc$  value for linear pMA was reported in literature to have a value of  $0.068 \text{ mL}\cdot\text{g}^{-1}$ .<sup>6</sup> The  $dn/dc$  value for linear pBnA was measured with an Optilab TrEX from Wyatt using the 100% mass recovery method and determined to be 0.112 in Astra V. The  $dn/dc$  value of the crosslinker was assumed to be similar to linear pMA  $0.068 \text{ mL}\cdot\text{g}^{-1}$ . The total mass of MI and crosslinker respectively are the values of  $m_{MI}$  and  $m_{CL}$  and are expressed in grams. The conversion of the crosslinker was determined with  $^1\text{H-NMR}$  using DMF as internal standard.  $X_{MI}$  is the weight fraction of incorporated MIs and corrects for the fact that the measured  $M_w$  via light scattering is not only stemming from the incorporated arms, but also the cross-linker core.  $X_{MI}$  can be calculated as follows:

$$X_{MI} = \frac{A_{star}m_{MI}\left(\frac{dn}{dc}\right)_{MI} - (1 - A_{star})m_{CL}conv_{CL}\left(\frac{dn}{dc}\right)_{CL}}{m_{MI}\left(\frac{dn}{dc}\right)_{MI}}$$

After obtaining all these values the number average value of arms per star can now be calculated according to the following equation:

$$N_{arms} = \frac{M_{w, MALS}}{M_{n, MI}} \cdot \frac{X_{MI}m_{MI}}{X_{MI}m_{MI} + m_{CL}conv_{CL}}$$

$M_{w, \text{ MALS}}$  is the weight-averaged molecular weight determined via MALS using Astra V from Wyatt Technologies.  $M_{n, \text{ MI}}$  is the number-averaged molecular weight of the MI obtained from SEC.

In case miktoarm core cross-linked star polymers were synthesized, the following formulas were employed to determine the average  $(dn/dc)_{\text{MI}}$  value and  $M_{n, \text{ MI}}$ :

$$\left(\frac{dn}{dc}\right)_{\text{MI}} = \frac{m_{\text{MI}-1} \left(\frac{dn}{dc}\right)_{\text{MI}-1} + m_{\text{MI}-2} \left(\frac{dn}{dc}\right)_{\text{MI}-2}}{m_{\text{MI}-1} + m_{\text{MI}-2}}$$

$$M_{n, \text{ MI}} = M_{n, \text{ MI},1} n_1 + M_{n, \text{ MI},2} n_2$$

In which  $n_1$  and  $n_2$  the molar contributions are of respectively  $\text{MI}_1$  and  $\text{MI}_2$  as determined by  $^1\text{H}$  NMR.

## Reactor design

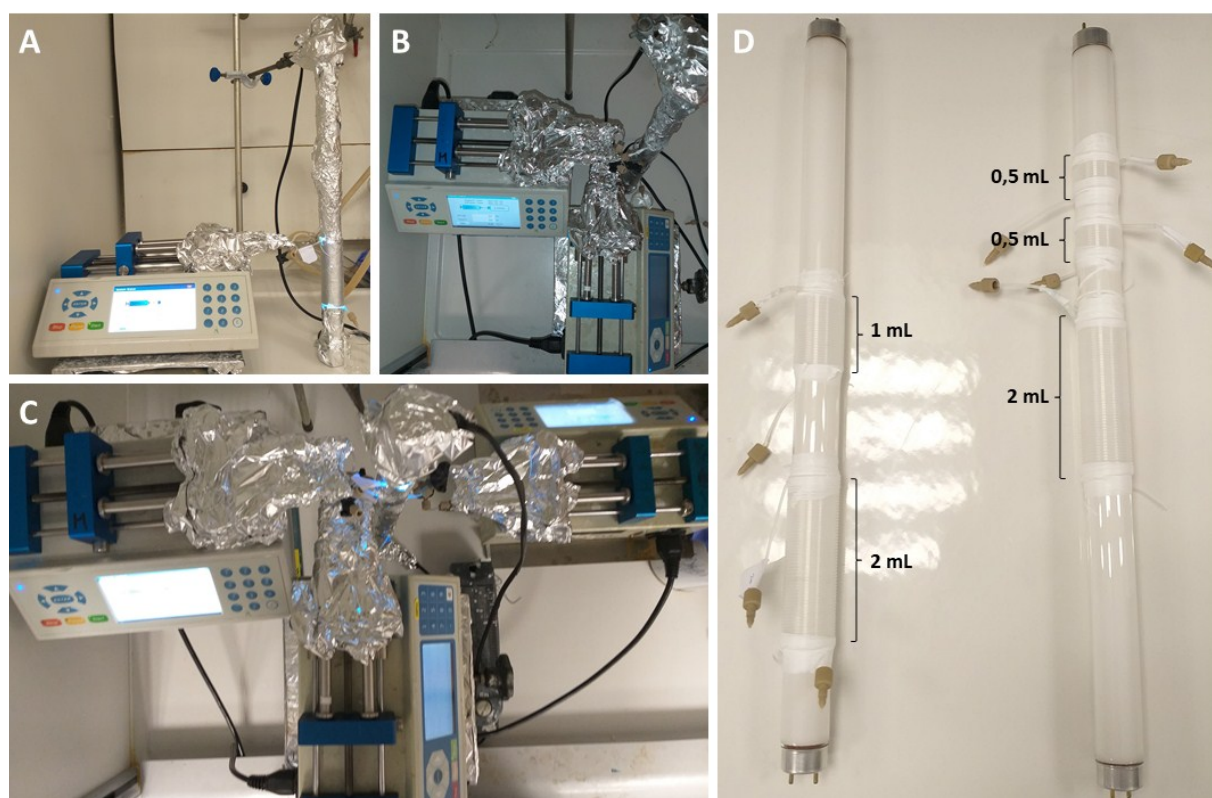

**Fig. S1** Photos of the used reactors in the current work. A, 2 mL PFA flow reactor for core cross-linked star (CCS) polymer synthesis. B, reactor cascade composed of a 1 mL PFA flow reactor for macroinitiator (MI) synthesis connected to a 2 mL PFA flow reactor for CCS polymer synthesis (top view). C, Reactor cascade composed of 2 0.5 mL PFA flow reactors for MI synthesis connected to a 2 mL PFA flow reactor for miktoarm CCS polymer synthesis (top view). D, picture of the PFA flow tubing wrapped around the UV lamps.

### SEC evolution of CCS polymer formation *via* flow and batch polymerization

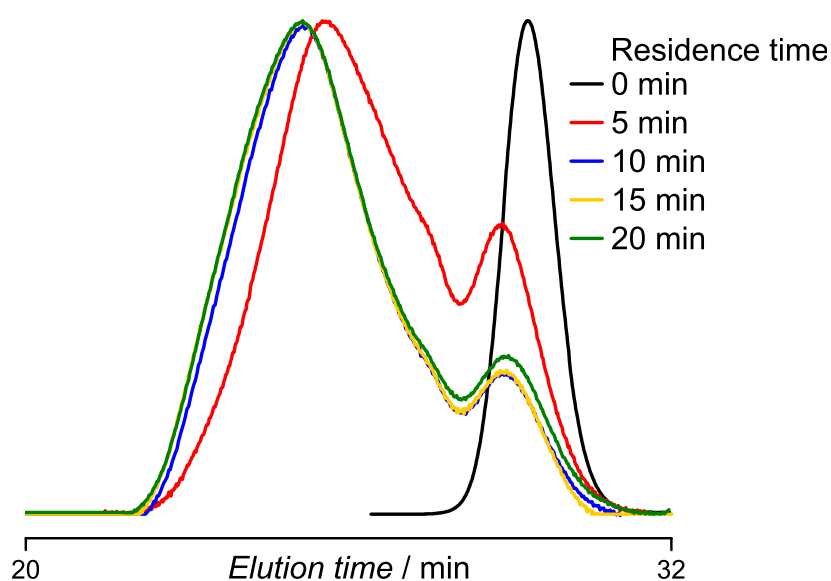

**Fig. S2** Evolution of SEC elugrams for core cross-linked star polymer synthesis in flow at different residence times. A reaction ratio of pMA : Cu<sup>II</sup>Br<sub>2</sub> : Me<sub>6</sub>TREN : BDDA = 1 : 0.02 : 0.09 : 10 and [pMA] = 0.0325M was used. The pMA macroinitiator had an  $M_n$  of 2700 g·mol<sup>-1</sup>.

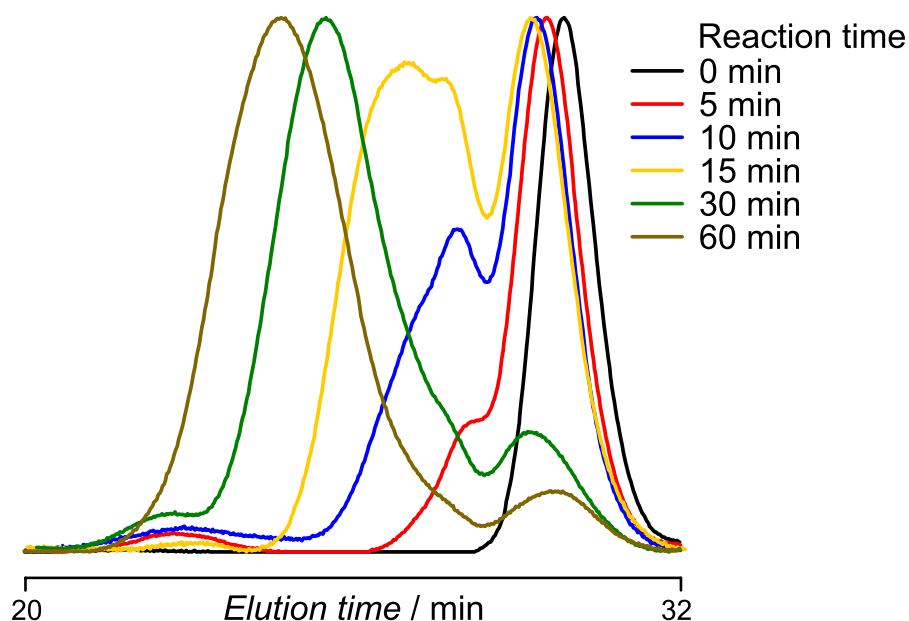

**Fig. S3** Evolution of SEC elugrams for core cross-linked star polymer synthesis in batch at different reaction times. A reaction ratio of pMA : Cu<sup>II</sup>Br<sub>2</sub> : Me<sub>6</sub>TREN : BDDA = 1 : 0.02 : 0.09 : 10 and [pMA] = 0.0325M was used. The pMA macroinitiator had an  $M_n$  of 2600 g·mol<sup>-1</sup>.

# Surface functionalized core cross-linked star polymer synthesis in a flow reactor cascade

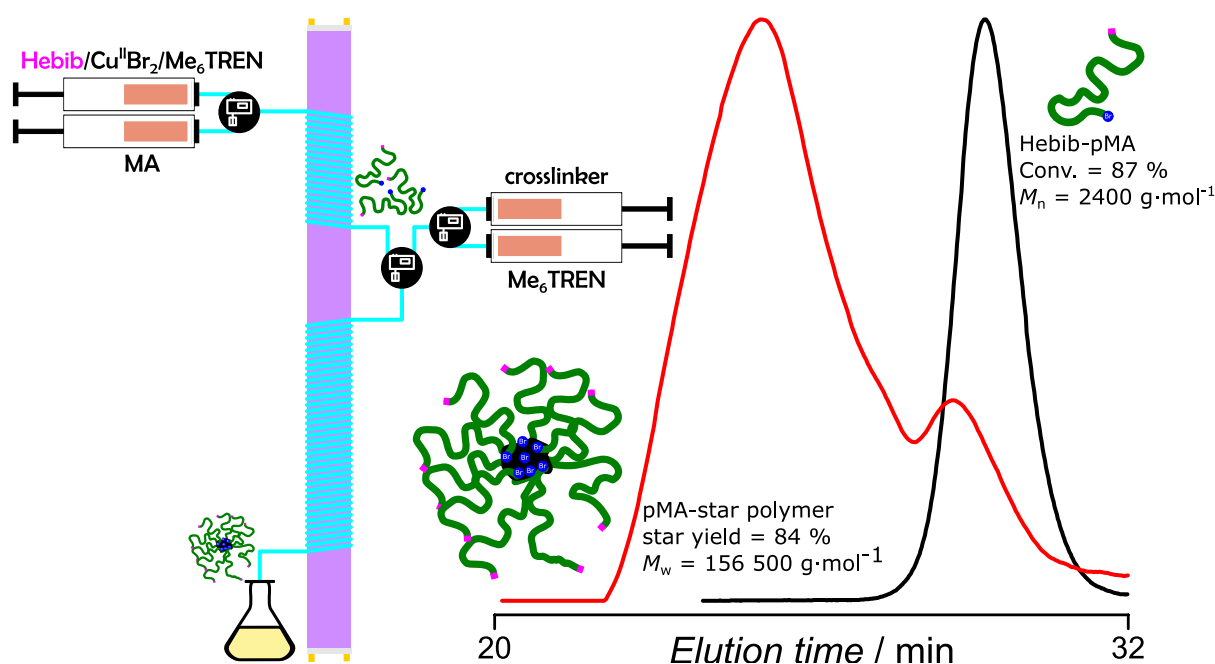

**Fig. S4** Surface functionalized core cross-linked star (CCS) polymer synthesis in a reactor cascade. Left, schematic visualization of the reactor. Right, SEC elugram of the MI and resulting CCS polymer. Monomer conversion, star yield,  $M_{n, MI}$  and  $M_{w, CCS \text{ polymer}}$  are also given. A reaction ratio of HEBiB:MA : Cu<sup>II</sup>Br<sub>2</sub> : Me<sub>6</sub>TREN : BDDA = 1 : 40 : 0.02 : 0.09 : 10 corresponding to a targeted [pMA] = 0.0325M.

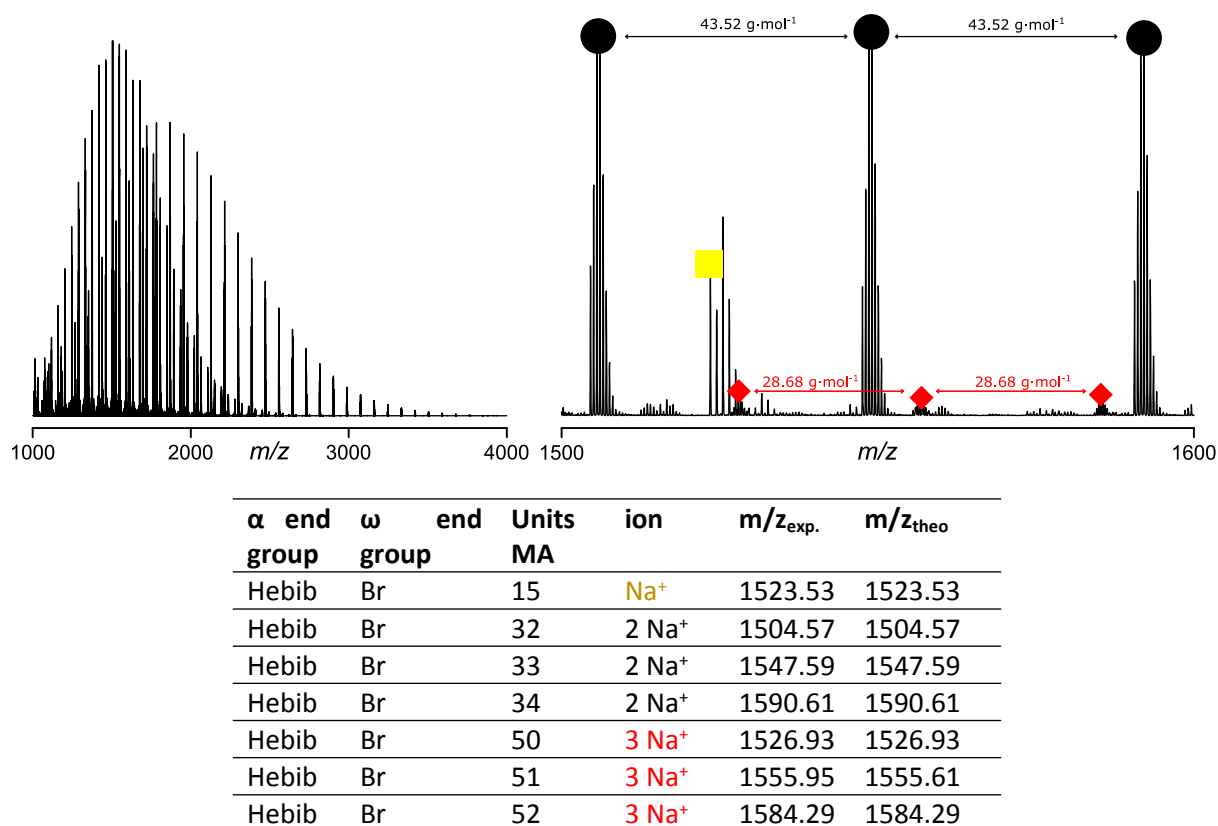

**Fig. S5** Electrospray ionization mass spectrometry measurement on the arms synthesized using HEBiB as initiator. Top left, complete mass spectrum. Top right, zoomed mass spectrum. Bottom table, assignment of the observed peaks in the top right spectrum.

## Pseudomiktoarm core cross-linked star polymer synthesis in a flow reactor cascade

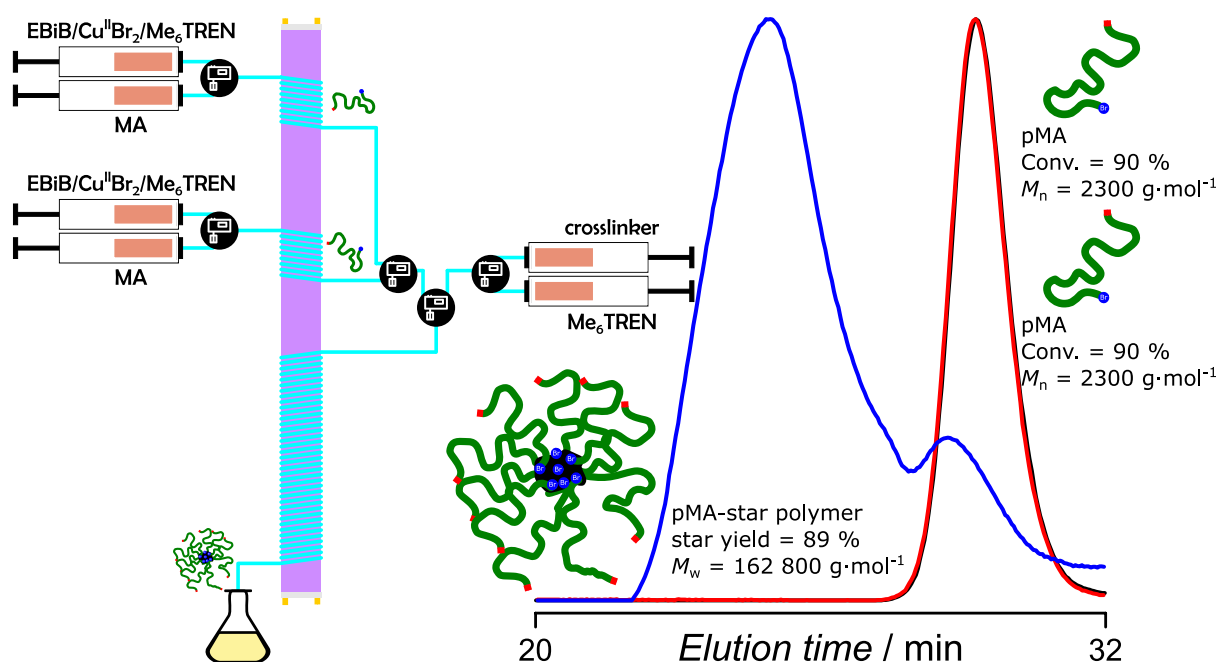

**Fig. S6** Pseudomiktoarm core cross-linked star (CCS) polymer synthesis in a reactor cascade. Left, schematic visualization of the reactor. Right, SEC elugram of the MIs and resulting CCS polymer. Monomer conversion, star yield,  $M_n$ , MI and  $M_w$ , CCS polymer are also given. A reaction ratio of EBIB : MA : Cu<sup>II</sup>Br<sub>2</sub> : Me<sub>6</sub>TREN : BDDA = 1 : 40 : 0.02 : 0.09 : 10 corresponding to a targeted [MI] = 0.0325M.

## References

1. Z. Yin, C. Koulic, C. Pagnoulle and R. Jérôme, *Macromolecules*, 2001, **34**, 5132-5139.
2. L. Feng, J. Hu, Z. Liu, F. Zhao and G. Liu, *Polymer*, 2007, **48**, 3616-3623.
3. C. Barner-Kowollik, S. Beuermann, M. Buback, P. Castignolles, B. Charleux, M. L. Coote, R. A. Hutchinson, T. Junkers, I. Lacík, G. T. Russell, M. Stach and A. M. van Herk, *Polym. Chem.*, 2014, **5**, 204.
4. T. G. McKenzie, E. H. H. Wong, Q. Fu, S. J. Lam, D. E. Dunstan and G. G. Qiao, *Macromolecules*, 2014, **47**, 7869-7877.
5. H. Gao and K. Matyjaszewski, *J. Am. Chem. Soc.*, 2007, **129**, 11828-11834.
6. T. Junkers, M. Schneider-Baumann, S. S. Koo, P. Castignolles and C. Barner-Kowollik, *Macromolecules*, 2010, **43**, 10427-10434.
